# Supplementary material for: Unsupervised machine learning improves risk stratification in newly diagnosed multiple myeloma: an analysis of the Spanish Myeloma Group
Source: PubMed Central journal article supplement (PMC9038663; doi:10.1038/s41408-022-00647-z), 2022-04-25
Supplement: 41408_2022_647_MOESM1_ESM.pdf [file 41408_2022_647_MOESM1_ESM.pdf]

**Supplementary Figure 1.** Results of GMM-EM-based clusterization with 3 and 4 optimal clusters across the 3 trial cohorts.

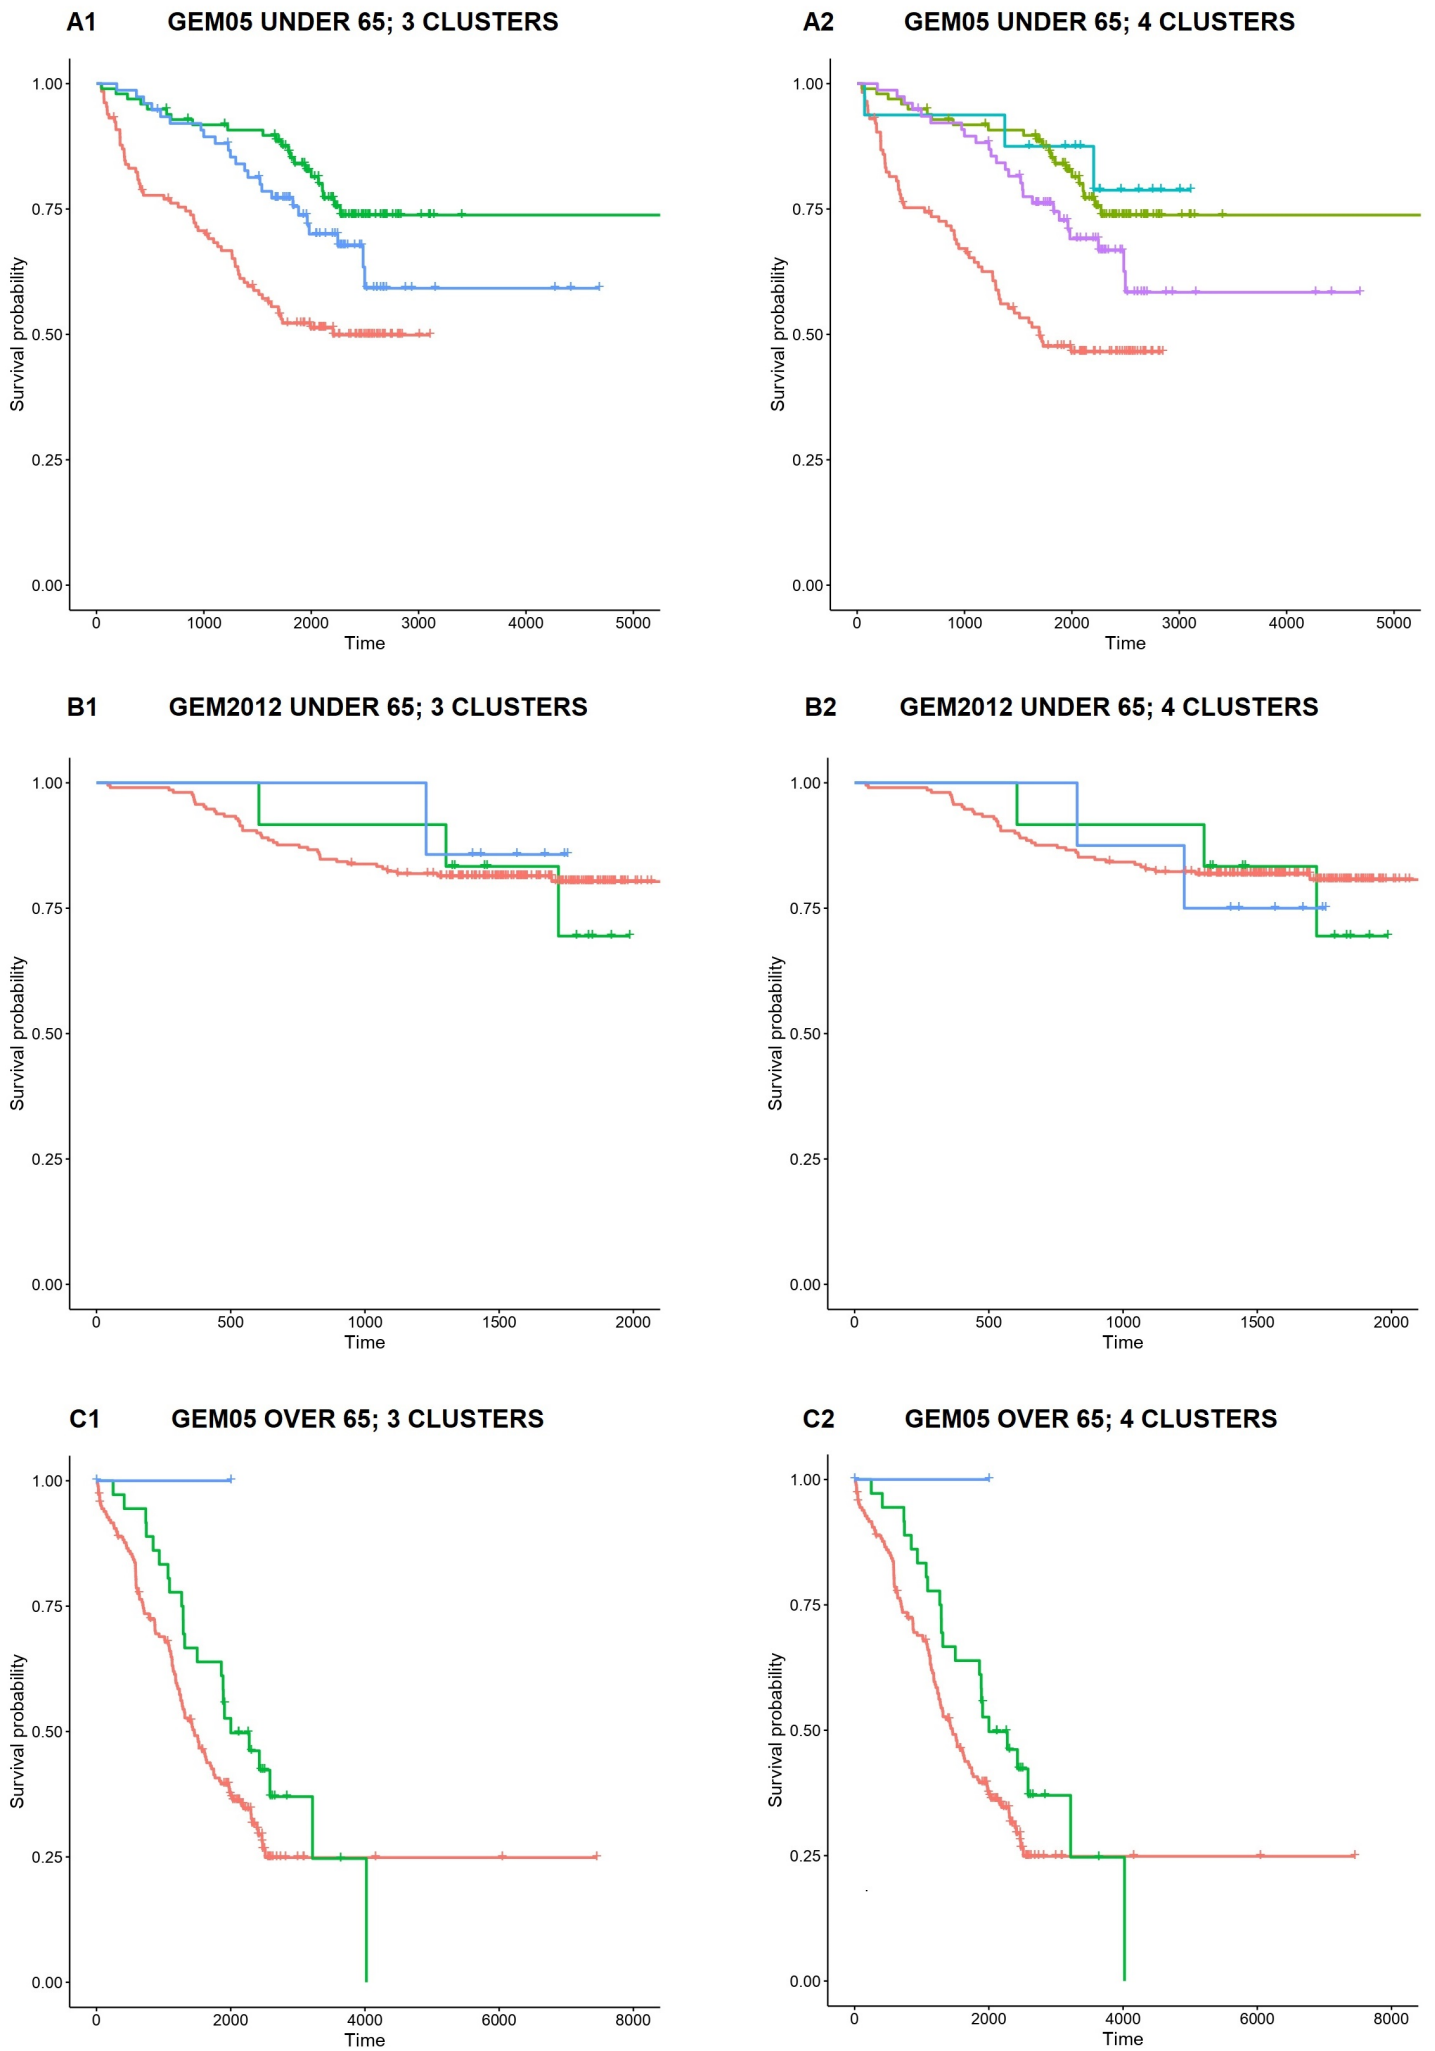

**Supplementary Figure 2.** Kaplan-Meier plots representing the overall survival of R-ISS I, II and III subgroups in the GEM05 under 65 years (A-C), GEM05 over 65 years (D-F) and GEM2012 under 65 years (G-H) trials. The red line represents patients in the “high-risk” cluster (cluster I), and the blue line represents patients in the “low-risk” cluster (cluster II).

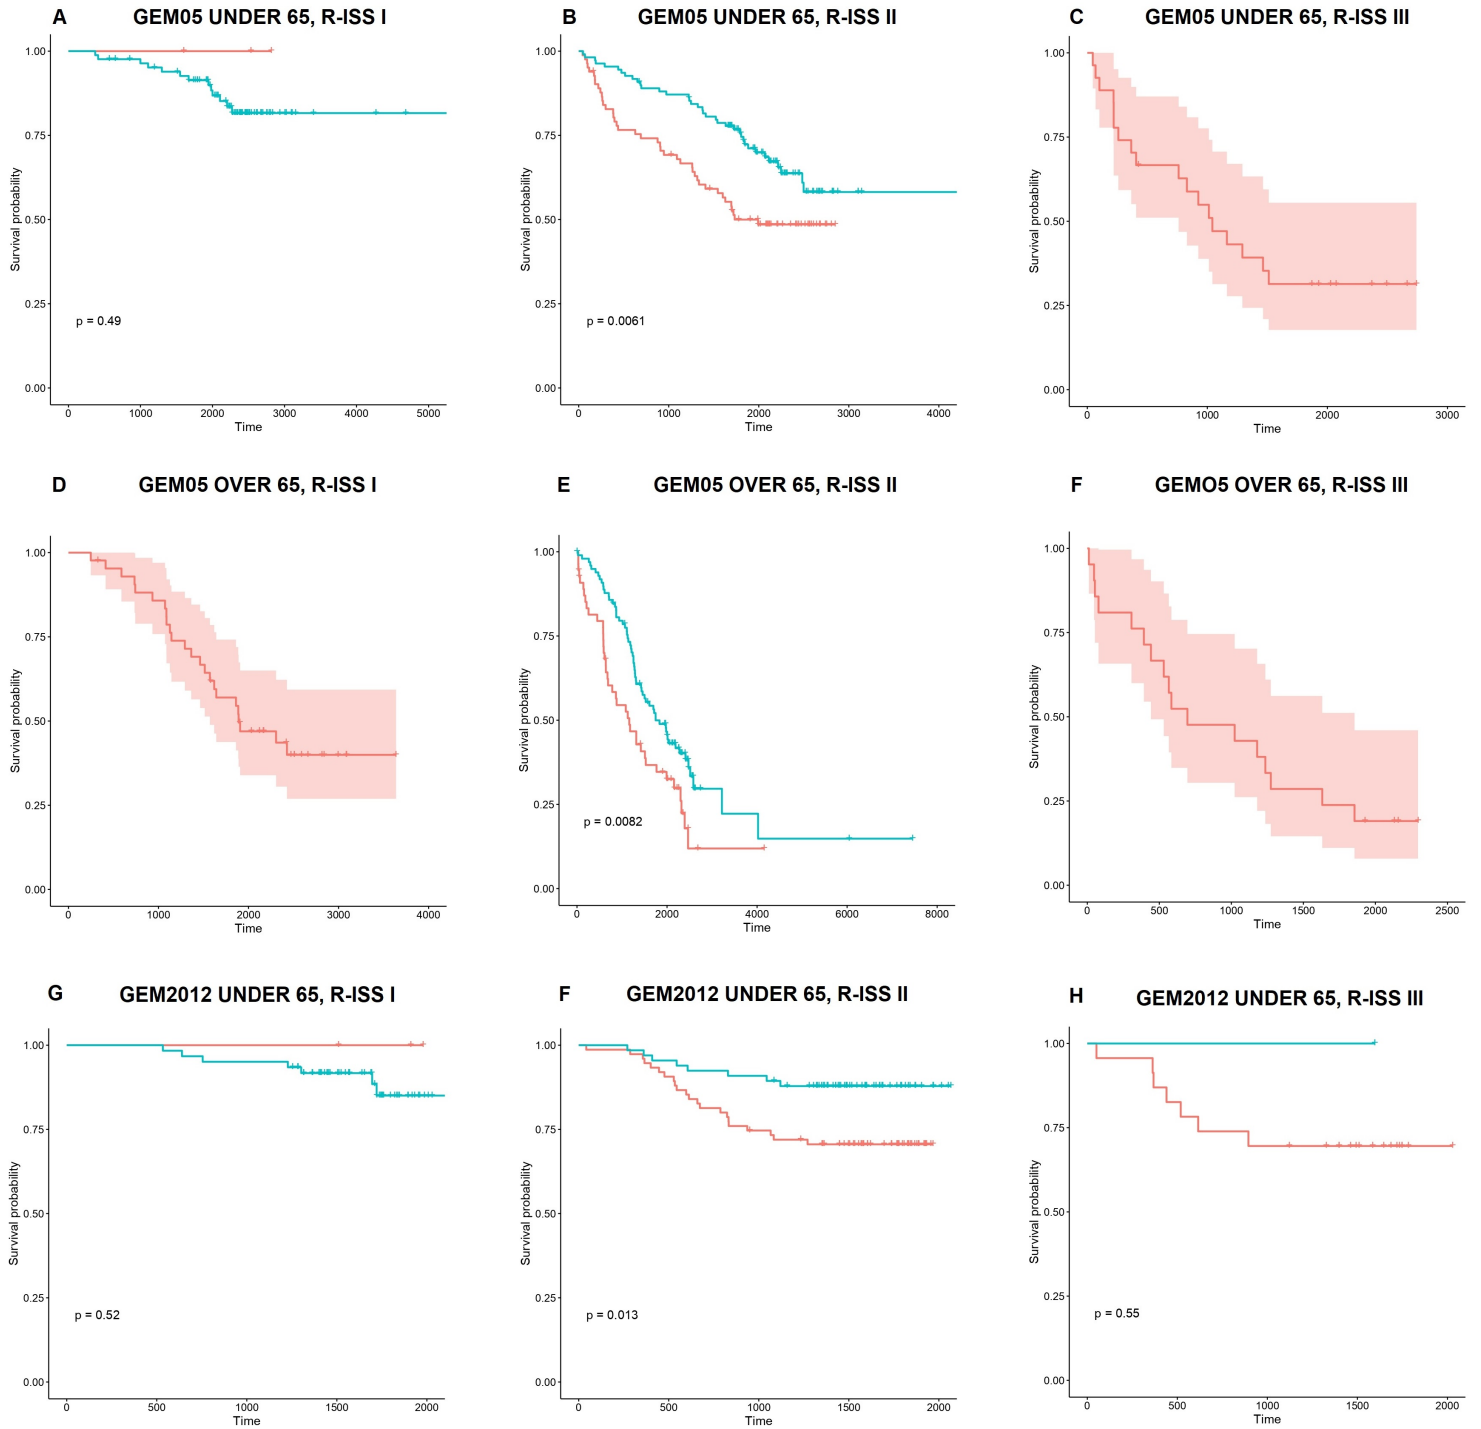

**Supplementary Figure 3.** Kaplan-Meier plots representing the overall survival of all patients as well as that of R-ISS I, II and III subgroups in the GEM05 under 65 years (A-D), GEM05 over 65 years (E-H) AND GEM2012 under 65 years (I-L) trials. The red line represents patients in the “high-risk” cluster (cluster I), and the blue line represents patients in the “low-risk” cluster (cluster II).

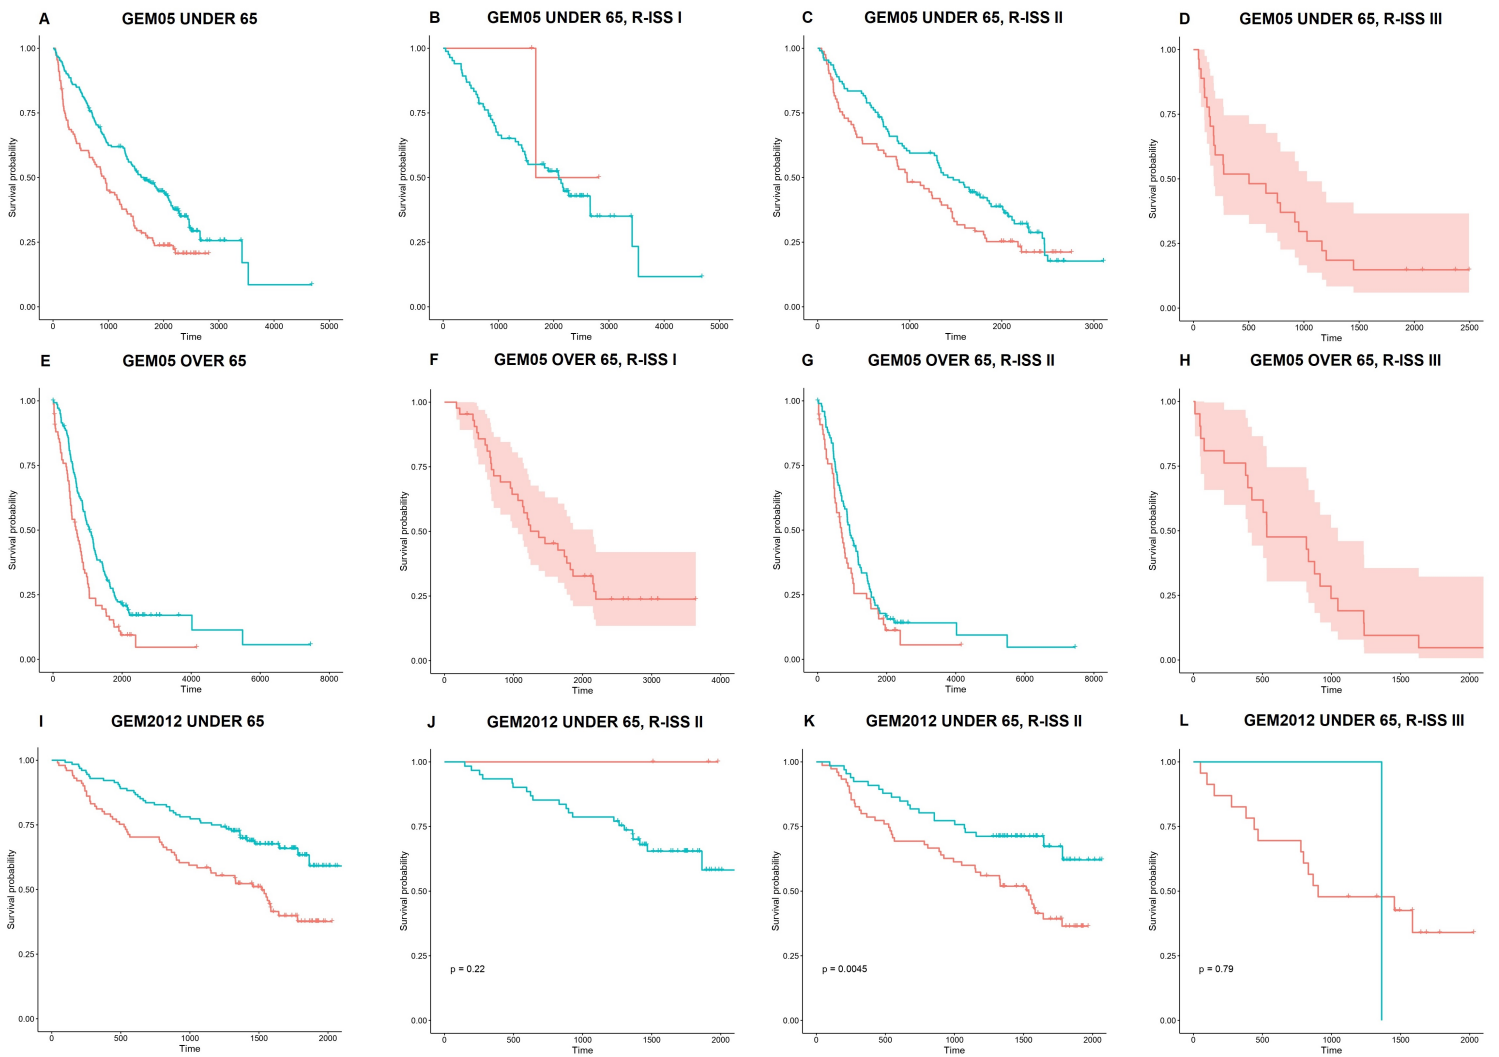

**Supplementary Figure 4.** Kaplan-Meier plots representing the overall survival of R-ISS I, II-low risk, II-high risk and III subgroups in the GEM05 under 65 years (A), GEM2012 under 65 years (B) and GEM05 over 65 years (C) trials.

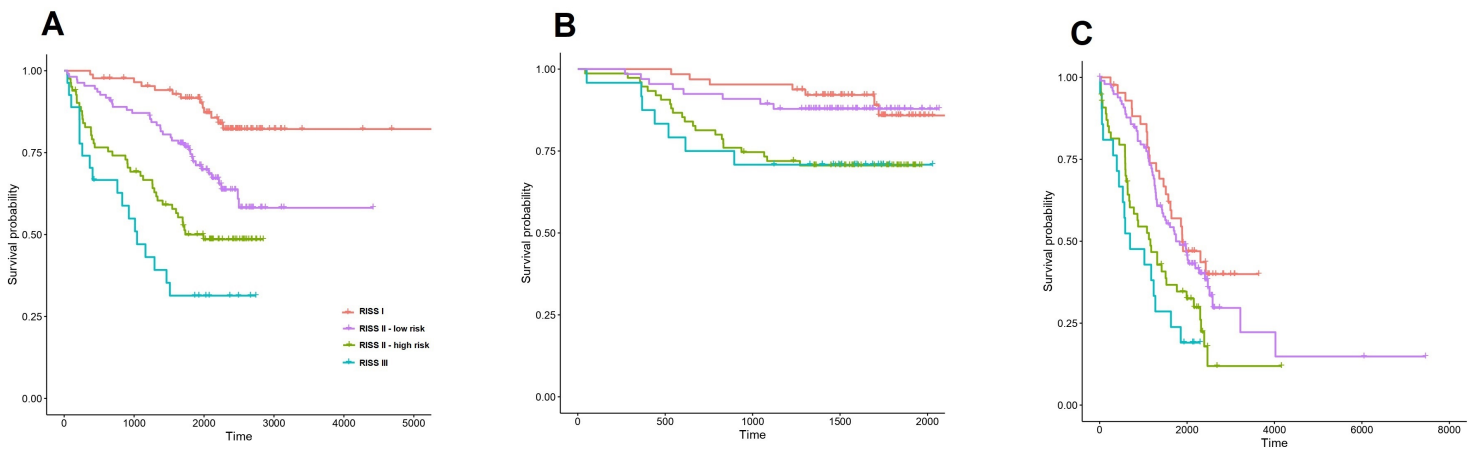

Supplementary Figure 5. Time-dependent AUCs representing the precision of the different models to predict overall survival.

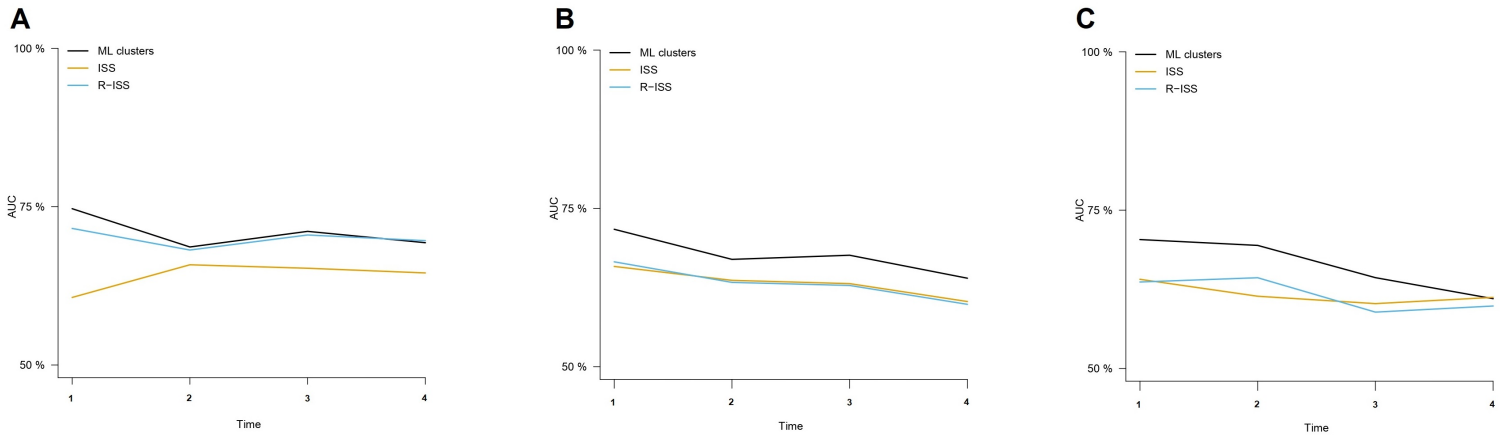

|                                             | <b>GEM05 under 65</b>                                                 | <b>GEM05 over 65</b>                                                   | <b>GEM2012 under 65</b>                                                 |
|---------------------------------------------|-----------------------------------------------------------------------|------------------------------------------------------------------------|-------------------------------------------------------------------------|
| <i>Hemoglobin*</i>                          | p-val 1.02 x 10 <sup>-5</sup> [-1.4, -0.60]                           | p-val 2.82 x 10 <sup>-5</sup> [-1.40, -0.50]                           | p-val 4.98 x 10 <sup>-4</sup> [-1.60, -0.30]                            |
| <i>Albumin-adjusted calcium*</i>            | p-val 0.84 [-0.26, 0.30]                                              | p-val 0.44 [-0.20, 0.46]                                               | p-val 0.24 [-0.30, 0.09]                                                |
| <i>B2-microglobulin*</i>                    | p-val 8.45 x 10 <sup>-5</sup> [0.45, 1.37]                            | p-val 5.15 x 10 <sup>-7</sup> [1.01, 2.32]                             | p-val 2.07 x 10 <sup>-4</sup> [0.40, 1.47]                              |
| <i>High risk cytogenetics**</i>             | p-val < 1 x 10 <sup>-5</sup>                                          | p-val < 1 x 10 <sup>-5</sup>                                           | p-val < 1 x 10 <sup>-5</sup>                                            |
| <i>t(4;14)**</i>                            | p-val < 1 x 10 <sup>-5</sup>                                          | p-val < 1 x 10 <sup>-5</sup>                                           | p-val < 1 x 10 <sup>-5</sup>                                            |
| <i>t(14;16)**</i>                           | p-val < 1 x 10 <sup>-5</sup>                                          | p-val 0.12                                                             | p-val < 1 x 10 <sup>-5</sup>                                            |
| <i>17p del**</i>                            | p-val < 1 x 10 <sup>-5</sup>                                          | p-val < 1 x 10 <sup>-5</sup>                                           | p-val < 1 x 10 <sup>-5</sup>                                            |
| <i>Raised LDH**</i>                         | p-val < 1 x 10 <sup>-5</sup>                                          | p-val < 1 x 10 <sup>-5</sup>                                           | p-val < 1 x 10 <sup>-5</sup>                                            |
| <i>Durie-Salmon stages I, II and III***</i> | Cluster 1: 3.30%, 77.05%, 50.41%<br>Cluster 2: 7.78%, 52.85% & 39.38% | Cluster 1: 7.89%, 38.16% & 53.94%<br>Cluster 2: 7.04%, 59.15% & 33.80% | Cluster 1: 12.87%, 33.66% & 53.47%<br>Cluster 2: 8.59%, 42.19% & 49.22% |

\* Wilcoxon Rank-Sum Test  
plus 95% Confidence Interval

\*\*Fisher's Test

\*\*\*Descriptive

**Supplementary Table 1.**

Differential distribution between the 2 unsupervised clusters of the different predictive variables which compose it. Continuous variables were analyzed with the Wilcoxon Rank-Sum Test and binomial variables were analyzed with Fisher's test. For Durie-Salmon stage distribution, descriptive statistics are provided.

| <b>Variables</b>                  | <b>GEM05 under 65</b>   |                          | <b>GEM05 over 65</b> |                          | <b>GEM2012 under 65</b> |                          |
|-----------------------------------|-------------------------|--------------------------|----------------------|--------------------------|-------------------------|--------------------------|
|                                   | <b><i>p-val</i></b>     | <b><i>HR (95%CI)</i></b> | <b><i>p-val</i></b>  | <b><i>HR (95%CI)</i></b> | <b><i>p-val</i></b>     | <b><i>HR (95%CI)</i></b> |
| <b><i>II-cluster 2 vs I</i></b>   | 2.00 x 10 <sup>-3</sup> | 2.71 [1.44, 5.11]        | 0.42                 | 1.21 [0.75, 1.95]        | 0.68                    | 1.23 [0.45, 3.42]        |
| <b><i>III vs II-cluster 1</i></b> | 0.06                    | 1.69 [0.97, 2.95]        | 0.21                 | 0.96 [0.39, 1.23]        | 0.90                    | 0.95 [0.40, 2.22]        |

**Supplementary Table 2.** Cox regression results comparing the outcomes of R-ISS I vs II-low risk and R-ISS III vs II-high risk.

|                                                                                                            | <b>GEM05 under 65</b>                                                | <b>GEM05 over 65</b>                                                  | <b>GEM2012 under 65</b>                                              |
|------------------------------------------------------------------------------------------------------------|----------------------------------------------------------------------|-----------------------------------------------------------------------|----------------------------------------------------------------------|
| <i>N</i>                                                                                                   | 191                                                                  | 154                                                                   | 141                                                                  |
| <i>Cluster I vs II</i>                                                                                     | 42.93% vs 57.07%                                                     | 35.71% vs 64.29%                                                      | 41.13% vs 58.87%                                                     |
| <i>High Risk Cytogenetics<br/>Cluster I vs II</i>                                                          | 52.43% vs 0%                                                         | 47.27% vs 0%                                                          | 56.63% vs 0%                                                         |
| <i>Durie-Salmon stages: I, II &amp; III</i>                                                                | Cluster 1: 3.66%, 46.34%, 50.00%<br>Cluster 2: 6.42%, 46.79%, 46.79% | Cluster 1: 10.91%, 41.82%, 47.27%<br>Cluster 2: 6.06%, 51.52%, 42.42% | Cluster 1: 9.64%, 33.73%, 56.63%<br>Cluster 2: 5.17%, 41.38%, 53.45% |
| <i>Median Hemoglobin (g/dL)</i>                                                                            | 10.5 vs 10.3                                                         | 9.9 vs 10.2                                                           | 10.4 vs 11.0                                                         |
| <i>Median albumin-adjusted<br/>calcium (mg/dL)</i>                                                         | 9.73 vs 9.88                                                         | 9.88 vs 10.18                                                         | 9.5 vs 9.6                                                           |
| <i>Median B2-microglobulin<br/>(mg/dL)</i>                                                                 | 3.35 vs 4.09                                                         | 4.3 vs 4.3                                                            | 3.5 vs 4.36                                                          |
| <i>Raised LDH</i>                                                                                          | 41.46% vs 0%                                                         | 27.27% vs 0%                                                          | 27.71% vs 0%                                                         |
| <i>Raised LDH or high risk<br/>cytogenetics</i>                                                            | 86.59% vs 0%                                                         | 69.09% vs 0%                                                          | 72.29% vs 0%                                                         |
| <i>Survival of Cluster I patients<br/>with and without either high risk<br/>cytogenetics or raised LDH</i> | HR 1.12, p-value 0.81                                                | HR 1.33, p-value 0.41                                                 | HR 0.98, p-value 0.96                                                |

**Supplementary Table 3.**

Distribution of the variables included in the unsupervised machine learning model according to cluster membership for R-ISS 2 patients. Also represented are the results of the survival analysis between "high-risk" cluster I patients with and without either high risk cytogenetics or raised LDH.



|                                            | <b>GEM05 under 65</b> | <b>GEM2012 under 65</b> | <b>GEM05 over 65</b> |
|--------------------------------------------|-----------------------|-------------------------|----------------------|
| <i>ISS</i>                                 | 0. 623                | 0. 598                  | 0. 578               |
| <i>RISS</i>                                | 0. 648                | 0. 600                  | 0. 563               |
| <i>UNSUPERVISED<br/>MODEL</i>              | 0. 645                | 0. 653                  | 0. 591               |
| <i>ISS+RISS</i>                            | 0. 615                | 0. 592                  | 0. 577               |
| <i>ISS + UNSUPERVISED<br/>MODEL</i>        | 0. 690                | 0. 659                  | 0. 619               |
| <i>RISS + UNSUPERVISED<br/>MODEL</i>       | 0. 688                | 0. 641                  | 0. 610               |
| <i>ISS + RISS +<br/>UNSUPERVISED MODEL</i> | 0. 700                | 0. 644                  | 0. 615               |

**Supplementary Table 4.**

C-indexes obtained after 10-fold cross-validation of the different cox regression models.
